# Supplementary material for: A network of cytosolic (co)chaperones promotes the biogenesis of mitochondrial signal-anchored outer membrane proteins
Source: eLife. 2022 Jul 25;11:e77706. doi: 10.7554/eLife.77706 (PMC9355564; doi:10.7554/eLife.77706)
Supplement: Figure 3—source data 4. [file elife-77706-fig3-data4.xlsx]

## Sheet: Sheet1
1	2020-11-03								2	2020-11-13							3	2020-09-01
	Ydj1									Ydj1								Ydj1
	Tom70	Tom20	Porin	Msp1	Mcr1					Tom70	Tom20	Porin	Msp1	Mcr1				tom70	Tom20	Porin	Msp1	Mcr1
0	100	100	100	100	100				0	100	100	100	100	100			0	100	100	100	100	100
1	100.728	91.0213	97.7761	91.2906	133.344				1	105.45	133.172	106.883	107.455	95.5135			1	99.4191	95.8949	102.281	96.6513	99.8702
2	99.2583	85.9332	90.6969	77.1664	133.291				2	108.445	182.576	98.2567	117.939	102.624			2	109.708	101.419	103.623	91.3287	82.8782
4	119.738	81.4318	102.273	92.9546	120.026				4	102.088	130.453	93.9732	120.721	100.644			4	101.792	91.0448	98.5475	85.8132	90.2626
	Sis1									Sis1								Sis1
0	Tom70	Tom20	Porin	Msp1	Mcr1					Tom70	Tom20	Porin	Msp1	Mcr1				tom70	Tom20	Porin	Msp1	Mcr1
1	100	100	100	100	100				0	100	100	100	100	100			0	100	100	100	100	100
2	102.299	98.8175	120.592	121.347	105.075				1	124.21	91.0186	99.347	85.348	73.2653			1	111.53	118.412	91.3687	85.5633	118.99
4	91.2893	85.5951	128.952	137.634	111.225				2	118.874	96.3215	110.624	103.698	82.3317			2	99.6252	92.008	72.5148	70.394	102.168
	62.3946	48.3705	154.265	195.481	120.819				4	99.409	49.5557	126.787	109.546	102.566			4	74.4098	64.4093	65.8249	65.2001	92.8569
Average
	Ydj1
	Tom70	Tom20	Msp1	Mcr1	Porin
0	100	100	100	100	100
1	101.865	106.696	98.4655	109.576	102.313
2	105.804	123.31	95.4781	106.264	97.5253
4	107.872	100.976	99.8296	103.644	98.2646
Average
	Sis1
	Tom70	Tom20	Msp1	Mcr1	Porin
0	100	100	100	100	100
1	112.68	102.749	97.4193	99.1101	103.769
2	103.263	91.3082	103.909	98.5747	104.03
4	78.7378	54.1118	123.409	105.414	115.625
SD	Ydj1
	Tom70	Tom20	Msp1	Mcr1	Porin
0	0	0	0	0	0
1	2.59013	18.8267	6.72253	16.9004	3.7178
2	4.65682	42.382	16.902	20.7413	5.30215
4	8.39102	21.2091	15.0574	12.3348	3.3944
SD
	Sis1
	Tom70	Tom20	Msp1	Mcr1	Porin
0	0	0	0	0	0
1	8.98165	11.5238	16.9194	19.1376	12.3335
2	11.5514	4.40692	27.451	12.066	23.5075
4	15.4179	7.29747	54.0829	11.5919	36.9579
