# Supplementary material for: A network of cytosolic (co)chaperones promotes the biogenesis of mitochondrial signal-anchored outer membrane proteins
Source: eLife. 2022 Jul 25;11:e77706. doi: 10.7554/eLife.77706 (PMC9355564; doi:10.7554/eLife.77706)
Supplement: Figure 3—source data 5. [file elife-77706-fig3-data5.xlsx]

## Sheet: Sheet1
No	Grp	Grp Name	Name	Type	Area [pixel]	Intensity [a.u.]	Intensity-Bkg [a.u.]	Intensity-Bkg [%]	Std. Quantity [ng]	Recalc. Quantity [ng]	Persentage			No	Grp	Grp Name	Name	Type	Area [pixel]	Intensity [a.u.]	Intensity-Bkg [a.u.]	Intensity-Bkg [%]	Std. Quantity [ng]	Recalc. Quantity [ng]	percentage
2	0				1600	582.003	399.274	4.31326	0	tom70	100			2	0				4559	2306.89	1205.15	7.57751	0	Tom70	100
3	0				1600	501.821	319.092	3.44707	1	tom70	79.918			3	0				4559	2268.77	1167.03	7.33782	1	Tom70	96.8368
4	0				1600	431.722	248.993	2.68981	2	tom70	62.3614			4	0				4559	1982.47	880.739	5.53772	2	Tom70	73.081
5	0				1600	315.933	133.205	1.43898	4	tom70	33.3617			5	0				4559	1799.29	697.552	4.38592	4	Tom70	57.8807
6	0				1600	1262.84	1080.12	11.6682	0	tom40	100			6	0				4559	1977.7	875.965	5.5077	0	Tom20	100
7	0				1600	1066.59	883.86	9.54811	1	tom40	81.8302			7	0				4559	1978.05	876.315	5.5099	1	Tom20	100.04
8	0				1600	970.856	788.127	8.51393	2	tom40	72.9669			8	0				4559	1853.17	751.439	4.72473	2	Tom20	85.7841
9	0				1600	791.736	609.007	6.57895	4	tom40	56.3835			9	0				4559	1506.28	404.547	2.54362	4	Tom20	46.183
10	0				1600	940.235	757.507	8.18315	0	porin	100			10	0				4559	1222.23	120.499	0.75765	0	porin	100
11	0				1600	768.997	586.269	6.33331	1	porin	77.3945			11	0				4559	1218.34	116.603	0.733152	1	porin	96.7665
12	0				1600	697.635	514.906	5.5624	2	porin	67.9738			12	0				4559	1195.76	94.0275	0.591206	2	porin	78.0315
13	0				1600	414.418	231.69	2.50288	4	porin	30.5858			13	0				4559	1126.76	25.021	0.157322	4	porin	20.7644
14	0				1600	723.378	540.649	5.8405	0	Msp1	100			14	0				4559	1918.7	816.968	5.13676	0	Fis1	100
15	0				1600	726.447	543.718	5.87365	1	Msp1	100.568			15	0				4559	2130.42	1028.69	6.46797	1	Fis1	125.915
16	0				1600	707.462	524.733	5.66856	2	Msp1	97.0561			16	0				4559	2143.22	1041.48	6.54842	2	Fis1	127.482
17	0				1600	730.61	547.881	5.91862	4	Msp1	101.338			17	0				4559	1876.5	774.766	4.87141	4	Fis1	94.8343
2	0				3869	2674.84	2250.95	25.1609	0	Mcr1	100			18	0				4559	2142.76	1041.02	6.54552	0	Mcr1	100
3	0				3869	2617.58	2193.68	24.5208	1	Mcr1	97.4561			19	0				4559	2070.09	968.356	6.08862	1	Mcr1	93.0197
4	0				3869	2721.38	2297.48	25.681	2	Mcr1	102.067			20	0				4559	2207.43	1105.7	6.95215	2	Mcr1	106.212
5	0				3869	2628.01	2204.11	24.6374	4	Mcr1	97.9194			21	0				4559	2126.31	1024.57	6.4421	4	Mcr1	98.4199
2	0				3285	1917.74	1448.67	30.0424	0	pic2	100			22	0				4559	1300.84	199.102	1.25187	0	Msp1	100
3	0				3285	1753.99	1284.91	26.6465	1	pic2	88.6964			23	0				4559	1321.55	219.816	1.38211	1	Msp1	110.404
4	0				3285	1769.26	1300.19	26.9633	2	pic2	89.7508			24	0				4559	1310.2	208.46	1.31071	2	Msp1	104.7
5	0				3285	1257.38	788.303	16.3478	4	pic2	54.4158			25	0				4559	1362.26	260.528	1.63809	4	Msp1	130.852
19	0				2769	446.681	192.873	1.87556	0	Tom20	100
20	0				2769	380.009	126.202	1.22723	1	Tom20	65.4326
21	0				2769	318.5	64.692	0.629085	2	Tom20	33.5412
22	0				2769	283.417	29.6092	0.287928	4	Tom20	15.3516
	tom70	Tom20	Msp1	Mcr1	Porin
0	100	100	100	100	100
1	88.3774	82.7363	105.486	95.2379	87.0805
2	67.7212	59.6627	100.878	104.14	73.0027
4	45.6212	30.7673	116.095	98.1697	25.6751
	SD
	tom70	Tom20	Msp1	Mcr1	Porin
0	0	0	0	0	0
1	8.45938	17.3037	4.91812	2.2182	9.686
2	5.35979	26.1215	3.82209	2.07256	5.02884
4	12.2595	15.4157	14.757	0.250262	4.91068
