# Supplementary material for: A network of cytosolic (co)chaperones promotes the biogenesis of mitochondrial signal-anchored outer membrane proteins
Source: eLife. 2022 Jul 25;11:e77706. doi: 10.7554/eLife.77706 (PMC9355564; doi:10.7554/eLife.77706)
Supplement: Figure 4—source data 2. [file elife-77706-fig4-data2.xlsx]

## Sheet: Sheet1
No	Grp	Grp Name	Name	Type	Area [pixel]	Intensity [a.u.]	Intensity-Bkg [a.u.]	Intensity-Bkg [%]	Std. Quantity [ng]	Recalc. Quantity [ng]			No	Grp	Grp Name	Name	Type	Area [pixel]	Intensity [a.u.]	Intensity-Bkg [a.u.]	Intensity-Bkg [%]	Std. Quantity [ng]	Recalc. Quantity [ng]			No	Grp	Grp Name	Name	Type	Area [pixel]	Intensity [a.u.]	Intensity-Bkg [a.u.]	Intensity-Bkg [%]	Std. Quantity [ng]	Recalc. Quantity [ng]				Grp	Grp Name	Name	Type	Area [pixel]	Intensity [a.u.]	Intensity-Bkg [a.u.]	Intensity-Bkg [%]	Std. Quantity [ng]	Recalc. Quantity [ng]
2	0				4361	1709.23	755.17	14.7516	Input WT YE				2	0				3939	1244.41	1053.63	17.2431	Input	WT			2	0				4949	1548.3	948.514	19.7565	input	WT				0				4361	1709.23	755.17	14.7516	Input WT YE
3	0				4361	1212.97	258.917	5.05773	1 WT YE				3	0				3939	885.615	694.839	11.3713	input	YS			3	0				4949	966.926	367.144	7.64723	1	WT				0				4361	1212.97	258.917	5.05773	1 WT YE
4	0				4361	1557.21	603.16	11.7822	5 wt YE				4	0				3939	353.606	162.831	2.66478	1	YS			4	0				4949	1091.07	491.293	10.2331	5	WT				0				4361	1557.21	603.16	11.7822	5 wt YE
5	0				4361	1725.2	771.146	15.0637	10 WT YE				5	0				3939	497.757	306.982	5.02386	5	YS			5	0				4949	1261.11	661.323	13.7747	10	WT				0				4361	1725.2	771.146	15.0637	10 WT YE
6	0				4361	1911.3	957.244	18.699	20 WT YE				6	0				3939	470.232	279.457	4.5734	10	YS			6	0				4949	1337.72	737.938	15.3705	20	WT				0				4361	1911.3	957.244	18.699	20 WT YE
7	0				4361	1504.81	550.756	10.7586	Input YS YE				7	0				3939	702.253	511.477	8.3705	20	YS			7	0				4949	1104.82	505.042	10.5195	input	YS				0				4361	1504.81	550.756	10.7586	Input YS YE
8	0				4361	1150.82	196.766	3.84365	1 YS YE				8	0				3939	626.913	436.138	7.13754	1	WT			8	0				4949	797.034	197.252	4.10855	1	YS				0				4361	1150.82	196.766	3.84365	1 YS YE
9	0				4361	1224.88	270.82	5.29025	5 YS YE				9	0				3939	930.348	739.573	12.1034	5	WT			9	0				4949	827.603	227.821	4.74526	5	YS				0				4361	1224.88	270.82	5.29025	5 YS YE
10	0				4361	1322.2	368.148	7.19147	10 YS YE				10	0				3939	1045.61	854.831	13.9896	10	WT			10	0				4949	920.454	320.672	6.67926	10	YS				0				4361	1322.2	368.148	7.19147	10 YS YE
11	0				4361	1341.16	387.109	10.5619	20 YS YE				11	0				3939	1261.49	1070.71	17.5226	20	WT			11	0				4949	943.796	344.014	7.16545	20	ys				0				4361	1341.16	387.109	12.5619	20 YS YE
1	0			Bkg	6327	1384.16	0	0					1	0			Bkg	3731	180.701	0	0					1	0			Bkg	16745	2029.37	0	0						0			Bkg	6327	1384.16	0	0
	0		Sum	Sum	43610	14659.8	5119.24	100						0		Sum	Sum	39390	8018.23	6110.48	100						0		Sum	Sum	49490	10798.8	4801.01	100						0		Sum	Sum	43610	14659.8	5119.24	100
					Import01	WT YE	YS YE											Import02	WT	YS									Import03	WT	YS												Import04	WT	YS
					0	0	0											0	0	0									0	0	0												0	0	0
					1	27.0482	20.5554											1	40.7333	15.2077									1	49.7527	26.7301												1	27.0482	20.5554
					5	63.01	28.2917											5	69.0728	28.6708									5	66.5764	30.8726												5	63.01	28.2917
					10	80.559	38.4592											10	79.8374	26.1									10	89.6177	43.4551												10	80.559	38.4592
					20	100	56.4837											20	100	47.7697									20	100	46.6183												20	100	67.1795
Import01	WT YE	YS YE
0	0	0
1	27.0482	20.5554
5	63.01	28.2917
10	80.559	38.4592
20	100	56.4837
				AVERAGE				SD
					WT YE	YS YE			WT YE	YS YE
Import02	WT	YS		0	0	0		0	0	0
0	0	0		1	36.1456	20.7622		1	11.1314	4.71008
1	40.7333	15.2077		5	65.4173	29.0317		5	2.96063	1.24023
5	69.0728	28.6708		10	82.6433	36.6184		10	4.66205	7.39718
10	79.8374	26.1		20	100	54.5128		20	0	9.52403
20	100	47.7697
Import03	WT	YS
0	0	0
1	49.7527	26.7301
5	66.5764	30.8726
10	89.6177	43.4551
20	100	46.6183
Import04	WT	YS
0	0	0
1	27.0482	20.5554
5	63.01	28.2917
10	80.559	38.4592
20	100	67.1795
