# Supplementary material for: A network of cytosolic (co)chaperones promotes the biogenesis of mitochondrial signal-anchored outer membrane proteins
Source: eLife. 2022 Jul 25;11:e77706. doi: 10.7554/eLife.77706 (PMC9355564; doi:10.7554/eLife.77706)
Supplement: Figure 4—source data 3. [file elife-77706-fig4-data3.xlsx]

## Sheet: Sheet1
No	Grp	Grp Name	Name	Type	Area [pixel]	Intensity [a.u.]	Intensity-Bkg [a.u.]	Intensity-Bkg [%]	Std. Quantity [ng]	Recalc. Quantity [ng]		No	Grp	Grp Name	Name	Type	Area [pixel]	Intensity [a.u.]	Intensity-Bkg [a.u.]	Intensity-Bkg [%]	Std. Quantity [ng]	Recalc. Quantity [ng]			No	Grp	Grp Name	Name	Type	Area [pixel]	Intensity [a.u.]	Intensity-Bkg [a.u.]	Intensity-Bkg [%]	Std. Quantity [ng]	Recalc. Quantity [ng]
2	0				4361	1709.23	755.17	14.7516	Input WT YE			2	0				3090	1700.06	1189.11	19.8941	Input WT YE				2	0				3663	564.414	398.863	33.1048	Input WT YE
3	0				4361	1212.97	258.917	8.05773	1 WT YE			3	0				3090	807.489	296.54	5.76118	1 WT YE				3	0				3663	202.623	37.0715	3.57686	1 WT YE
4	0				4361	1557.21	603.16	11.7822	5 wt YE			4	0				3090	910.394	399.445	6.68279	5 wt YE				4	0				3663	217.503	51.9516	4.31187	5 wt YE
5	0				4361	1725.2	771.146	15.0637	10 WT YE			5	0				3090	987.286	476.337	7.96922	10 WT YE				5	0				3663	228.432	62.8808	5.21898	10 WT YE
6	0				4361	1911.3	957.244	18.699	20 WT YE			6	0				3090	1033.99	523.042	8.7506	20 WT YE				6	0				3663	236.823	71.2717	6.9154	20 WT YE
7	0				4361	1504.81	550.756	10.7586	Input YS YE			7	0				3090	1730.23	1219.29	20.3989	Input YS YE				7	0				3663	485.094	319.543	26.5214	Input YS YE
8	0				4361	1150.82	196.766	7.84365	1 YS YE			8	0				3090	888.867	377.918	5.12265	1 YS YE				8	0				3663	211.923	46.3721	3.24879	1 YS YE
9	0				4361	1224.88	270.82	10.2902	5 YS YE			9	0				3090	938.241	427.292	6.14869	5 YS YE				9	0				3663	231.916	66.3655	4.5082	5 YS YE
10	0				4361	1322.2	368.148	14.1915	10 YS YE			10	0				3090	1043.42	532.471	7.90835	10 YS YE				10	0				3663	237.403	71.8522	5.96358	10 YS YE
11	0				4361	1341.16	387.109	17.5619	20 YS YE			11	0				3090	1046.72	535.766	8.96348	20 YS YE				11	0				3663	244.229	78.6784	6.53014	20 YS YE
1	0			Bkg	6327	1384.16	0	0				1	0			Bkg	3090	510.949	0	0					1	0			Bkg	3663	165.551	0	0
	0		Sum	Sum	43610	14659.8	5119.24	100					0		Sum	Sum	30900	11086.7	5977.21	100						0		Sum	Sum	36630	2860.36	1204.85	100
					Import01	WT YE	YS YE								Import02	WT YE	YS YE												Import03	WT YE	YS YE
					0	0	0								0	0	0												0	0	0
					1	43.0918	41.947								1	65.8375	58.5405												1	51.7231	46.979
					5	63.01	55.0311								5	76.3695	70.2659												5	62.3517	65.1907
					10	80.559	75.8944								10	91.0706	90.3749												10	75.4689	86.2363
					20	100	93.9189								20	100	102.433												20	100	94.429
Import01	WT YE	YS YE
0	0	0
1	43.0918	41.947
5	63.01	55.0311
10	80.559	75.8944
20	100	93.9189
Import02	WT YE	YS YE
0	0	0		AVERAGE				Standard deviation
1	65.8375	58.5405			WT YE	YS YE			WT YE	YS YE
5	76.3695	70.2659		0	0	0		0	0	0
10	91.0706	90.3749		1	53.5508	49.1555		1	11.4825	8.50817
20	100	102.433		5	67.2438	63.4959		5	7.91001	7.7575
				10	82.3662	84.1686		10	7.95629	7.45841
				20	100	96.9269		20	0	4.77501
Import03	WT YE	YS YE
0	0	0
1	51.7231	46.979
5	62.3517	65.1907
10	75.4689	86.2363
20	100	94.429
