# Supplementary material for: A network of cytosolic (co)chaperones promotes the biogenesis of mitochondrial signal-anchored outer membrane proteins
Source: eLife. 2022 Jul 25;11:e77706. doi: 10.7554/eLife.77706 (PMC9355564; doi:10.7554/eLife.77706)
Supplement: Figure 7—source data 2. [file elife-77706-fig7-data2.xlsx]

## Sheet: Sheet1
IVI01
	BSA	cBag				Average			SD
0	0	0				BSA	cBag			BSA	cBag
1	82.7791	13.7955			0	0	0		0	0	0
5	93.1396	31.5734			1	57.2336	23.8492		1	18.7248	15.332
10	100	48.6616			5	83.3504	34.2648		5	18.6006	15.7326
					10	100	51.4639		10	0	18.6251
IVI02
	BSA	cBag
0	0	0
1	60.4851	48.5039
5	99.2632	62.395
10	100	79.856
MGI003
	BSA	cBag
0	0	0
2	55.5764	41.3336
5	89.2689	53.6121
10	100	85.626
MGI016
	BSA	cBag
0	0	0
2	30.0937	15.6129
5	51.73	23.7433
10	100	43.1757
