# Supplementary material for: A network of cytosolic (co)chaperones promotes the biogenesis of mitochondrial signal-anchored outer membrane proteins
Source: eLife. 2022 Jul 25;11:e77706. doi: 10.7554/eLife.77706 (PMC9355564; doi:10.7554/eLife.77706)
Supplement: Figure 7—source data 3. [file elife-77706-fig7-data3.xlsx]

## Sheet: Sheet1
MGI004						Average				SD
time[min]	WT+BSA	WT+cBag				BSA	Cbag			BSA	Cbag
0	0	0			0	0	0		0	0	0
2	54.7737	8.27665			2	61.9745	8.27111		2	7.25	0.554628
5	70.6841	12.0744			5	77.9276	17.2047		5	12.8096	5.03412
10	100	14.1372			10	100	15.9995		10	0	1.69571
MGI012
	BSA	Cbag
0	0	0
1	57.1999	8.9476
5	78.876	24.0446
10	100	18.2391
MGI023
	BSA	cBag
0	0	0
1	73.9501	7.58907
5	84.2229	15.4952
10	100	15.6221
