# Supplementary material for: A network of cytosolic (co)chaperones promotes the biogenesis of mitochondrial signal-anchored outer membrane proteins
Source: eLife. 2022 Jul 25;11:e77706. doi: 10.7554/eLife.77706 (PMC9355564; doi:10.7554/eLife.77706)
Supplement: Figure 8—source data 2. [file elife-77706-fig8-data2.xlsx]

## Sheet: Sheet1
Msp1	GSTP04	GSTP06	GSTP019	GSTP023	GSTP024
GST	11.3408	10.1028	28.0311	5.21735	9.66782
GST Tom20				14.2279	19.9745
GST Tom70	33.2127	19.7151	49.975	2.62772	23.8369
Mcr1	GSTP03	GSTP019	GSTP023	GSTP024
GST	12.7715	2.69862	1.3145	4.32563
GST Tom20			50.1995	39.5307
GST Tom70	29.715	23.6859	4.41306	2.66443
normalized according to GST binding
Msp1
GST Tom20	2.72703	2.06608
GST Tom70	2.9286	1.95145	1.78284	0.503651	2.46559
Mcr1
GST Tom20		38.189	9.13872
GST Tom70	2.32667	8.77704	3.35721	0.615963
Average
	Msp1		Mcr1
GST	1	GST	1
GST-Tom20	2.39655	GST-Tom20	23.6639
GST-Tom70	1.92643	GST-Tom70	3.76922
SD
	Msp1	Mcr1
GST	0	0
GST-Tom20	0.330474	14.5251
GST-Tom70	0.817385	3.05254
