# Supplementary material for: A network of cytosolic (co)chaperones promotes the biogenesis of mitochondrial signal-anchored outer membrane proteins
Source: eLife. 2022 Jul 25;11:e77706. doi: 10.7554/eLife.77706 (PMC9355564; doi:10.7554/eLife.77706)
Supplement: Figure 9—source data 3. [file elife-77706-fig9-data3.xlsx]

## Sheet: Sheet1
IVI059
Msp1						Mcr1
	_	Trypsin	PK				_	Trypsin	PK
0	0	0	0			0	0	0	0
1	21.622	13.021	25.0311			1	22.6765	16.6994	32.0498
5	60.8411	36.9368	65.2618			5	54.3233	33.1355	51.7532
15	100	52.0402	98.4729			15	100	68.2821	109.035
IVI061
Msp1						Mcr1						Average						SD
	_	Trypsin	PK				_	Trypsin	PK				Msp1	no treatment	Trypsin	PK		Msp1	no treatment	Trypsin	PK
0	0	0	0			0	0	0	0				0	0	0	0		0	0	0	0
1	28.6829	3.24334	25.5175			1	31.5904	4.32494	39.1505				1	31.4374	6.05661	24.7241		1	6.79451	4.02099	9.0457
5	49.5967	11.9316	65.4453			5	39.1502	17.7262	64.9295				5	59.6548	16.0425	51.4944		5	7.96243	11.82	19.5742
15	100	26.2987	86.1046			15	100	34.5176	125.171				15	100	26.2421	73.8509		15	0	14.9101	29.1814
													Mcr1	no treatment	Trypsin	PK		Mcr1	no treatment	Trypsin	PK
IVI060													0	0	0	0		0	0	0	0
Msp1						Mcr1							1	32.0353	11.0347	32.1679		1	7.15265	6.5114	4.70927
	no treatmnet	Trypsin	PK				no treatmnet	Trypsin	PK				5	55.0997	21.8808	50.3202		5	12.1353	8.64006	9.26913
0	0	0	0			0	0	0	0				15	100	39.2069	85.4918		15	0	17.3625	30.0932
1	31.3339	3.73198	31.5729			1	42.6937	9.04158	33.8734
5	65.8331	9.91839	52.6361			5	67.1821	13.9068	49.6439
15	100	18.0844	71.8204			15	100	21.7237	74.7564
IVI062
Msp1						Mcr1
	no treatment	trypsin	PK				no treatment	trypsin	PK
0	0	0	0			0	0	0	0
1	37.3176	5.91313	9.61227			1	32.81	6.07713	27.4923
5	68.3917	13.0656	17.9506			5	66.8372	15.5832	40.4387
15	100	16.8665	24.5018			15	100	33.6359	59.9504
IVI063
Msp1						Mcr1
	no treatment	Trypsin	PK				no treatment	Trypsin	PK
0	0	0	0			0	0	0	0
1	38.2304	4.37363	31.8866			1	30.406	19.0305	28.2733
5	53.6112	8.36023	56.1783			5	48.0058	29.0523	44.8358
15	100	17.9205	88.3549			15	100	37.8755	58.5462
