# Supplementary material for: A network of cytosolic (co)chaperones promotes the biogenesis of mitochondrial signal-anchored outer membrane proteins
Source: eLife. 2022 Jul 25;11:e77706. doi: 10.7554/eLife.77706 (PMC9355564; doi:10.7554/eLife.77706)
Supplement: Figure 9—source data 4. [file elife-77706-fig9-data4.xlsx]

## Sheet: Sheet1
Mcr1:
No	Grp	Grp Name	Name	Type	Area [pixel]	Intensity [a.u.]	Intensity-Bkg [a.u.]	Intensity-Bkg [%]	Std. Quantity [ng]	Recalc. Quantity [ng]
2	0				4085	1150.07	402.701	3.64704	1	WT -	MCr1
3	0				4085	889.541	142.175	7.28953	5	WT -			WT Mito			Tom20D Mito
4	0				4085	971.735	224.369	11.5037	15	WT -				Mcr1-	Mcr1 +		Mcr1-	Mcr1 +
5	0				4085	820.584	73.2188	2.75404	1	WT +			0	0	0	0	0	0
6	0				4085	824.18	76.8146	3.93839	5	WT +			1	31.703	23.9403	1	59.1602	28.0081
7	0				4085	851.929	104.563	5.3611	15	WT +			5	63.3666	34.2358	5	77.3787	46.6862
8	0				4085	880.103	132.737	6.80564	1	20 -			15	100	46.6031	15	124.633	68.4036
9	0				4085	920.98	173.614	8.90145	5	20 -
10	0				4085	1027	279.639	14.3375	15	20 -										Avg Mcr1
11	0				4085	829.711	82.3456	3.22198	1	20 +										WT Mito			Tom20D Mito
12	0				4085	852.115	104.749	5.37066	5	20 +											Mcr1-	Mcr1 +		Mcr1-	Mcr1 +
13	0				4085	900.842	153.477	7.86897	15	20 +										0	0	0	0	0	0
1	0			Bkg	5049	923.733	0	0												1	31.8535	20.1099	1	52.3292	25.7547
	0		Sum	Sum	49020	10918.8	1950.4	100												5	57.8293	37.4314	5	76.5046	46.0361
																				15	100	66.1687	15	126.986	63.3751
No	Grp	Grp Name	Name	Type	Area [pixel]	Intensity [a.u.]	Intensity-Bkg [a.u.]	Intensity-Bkg [%]	Std. Quantity [ng]	Recalc. Quantity [ng]
2	0				4085	1150.07	502.741	4.64704	1	WT-	MCr1
3	0				4085	889.541	352.252	8.28953	5	WT-			WT Mito			Tom20D Mito
4	0				4085	971.735	324.869	13.5037	15	WT-				Mcr1-	Mcr1 +		Mcr1-	Mcr1 +
2	0				2835	745.178	240.435	3.53643	1	WT +			0	0	0	0	0	0
3	0				2835	578.584	73.8413	6.30706	5	WT +			1	34.4129	26.1885	1	50.8892	27.4633
4	0				2835	570.212	65.4693	11.592	15	WT +			5	61.3869	46.706	5	79.8368	44.6912
5	0				2835	585.198	80.4548	6.87195	1	20 -			15	100	85.8427	15	134.043	64.9159
6	0				2835	654.379	149.636	10.781	5	20 -
7	0				2835	775.201	270.458	18.1008	15	20 -
8	0				2835	562.943	58.1999	4.97107	1	20 +
9	0				2835	599.452	94.7093	8.08947	5	20 +
10	0				2835	642.312	137.569	11.7503	15	20 +
1	0			Bkg	4655	828.776	0	0
	0		Sum	Sum	25515	5713.46	1170.77	100
IVI039																				Avg.						SD
No	Grp	Grp Name	Name	Type	Area [pixel]	Intensity [a.u.]	Intensity-Bkg [a.u.]	Intensity-Bkg [%]	Std. Quantity [ng]	Recalc. Quantity [ng]										Mcr1						Mcr1
2	0				2720	771.49	70.9579	3.07181	1	WT	MCr1										WT -	WT +C90	20d -	20d +C90			WT -	WT +C90	20d -	20d +C90
3	0				2720	817.977	117.444	5.08423	5	WT			WT mito			Tom20D Mito				0	0	0	0	0		0	0	0	0	0
4	0				2720	1033.92	333.387	10.4325	15	WT				Mcr1-	Mcr1 +		Mcr1-	Mcr1 +		1	31.8535	20.1099	52.3292	25.7547		1	2.48763	8.65478	6.23697	3.44193
5	0				2720	725.115	24.583	1.06421	1	WT+			0	0	0	0	0	0		5	57.8293	37.4314	76.5046	46.0361		5	7.93832	8.16041	3.84452	1.16491
6	0				2720	776.088	75.5556	3.27084	5	WT+			1	29.4445	10.2009	1	46.9382	21.7928		15	100	66.1687	126.986	63.3751		15	0	19.62	6.22386	5.95051
7	0				2720	813.531	112.998	6.89177	15	WT+			5	48.7345	31.3524	5	72.2983	46.7309
8	0				2720	906.047	205.514	4.89683	1	20d			15	100	66.0604	15	122.281	56.8057
9	0				2720	944.062	243.53	7.54254	5	20d
10	0				2720	1318.61	618.079	12.757	15	20d
11	0				2720	834.051	133.519	2.7801	1	20d+
12	0				2720	884.44	183.907	5.96146	5	20d+
13	0				2720	891.029	190.496	7.24669	15	20d+
1	0			Bkg	2275	585.923	0	0
	0		Sum	Sum	32640	10716.4	2309.97	100
Msp1:
No	Grp	Grp Name	Name	Type	Area [pixel]	Intensity [a.u.]	Intensity-Bkg [a.u.]	Intensity-Bkg [%]	Std. Quantity [ng]	Recalc. Quantity [ng]
2	0				2945	948.483	399.366	5.3675	1	WT -	Msp1
3	0				2945	1204.06	654.944	8.80249	5	WT -
4	0				2945	1286.98	737.867	10.917	15	WT -		WT Mito				Tom20D Mito
5	0				2945	952.191	403.074	5.41734	1	WT +			Msp1-	Msp1 +			Msp1-	Msp1 +
6	0				2945	1069.98	520.866	7.00048	5	WT +		0	0	0		0	0	0
7	0				2945	1267.15	718.037	9.65047	15	WT +		1	49.1665	49.6231		1	72.5852	43.8023
8	0				2945	1138.71	589.589	7.92412	1	20 -		5	80.6312	64.1247		5	83.3404	58.8977
9	0				2945	1226.07	676.95	9.09825	5	20 -		15	100	88.3987		15	123.637	70.1098
10	0				2945	1553.39	1004.27	13.4974	15	20 -
11	0				2945	989.011	439.894	5.9122	1	20 +
12	0				2945	1215.01	665.896	7.94968	5	20 +
13	0				2945	1178.8	629.687	9.46304	15	20 +													Avg Msp1
1	0			Bkg	4185	780.325	0	0														WT Mito			Tom20D Mito
	0		Sum	Sum	35340	14029.8	7440.44	100															Msp1-	Msp1 +		Msp1-	Msp1 +
																						0	0	0	0	0	0
																						1	55.168	42.0663	1	60.4566	36.448
No	Grp	Grp Name	Name	Type	Area [pixel]	Intensity [a.u.]	Intensity-Bkg [a.u.]	Intensity-Bkg [%]	Std. Quantity [ng]	Recalc. Quantity [ng]												5	83.7073	58.2006	5	91.8778	60.086
2	0				3627	919.728	292.936	5.10136	1	WT -	Msp1											15	100	81.1579	15	125.195	68.034
3	0				3627	967.169	340.377	9.41337	5	WT -
4	0				3627	976.691	349.899	12.6767	15	WT -
5	0				3627	796.364	169.572	2.68965	1	WT +		WT Mito				Tom20D Mito
6	0				3627	786.01	159.218	4.40329	5	WT +			Msp1-	Msp1 +			Msp1-	Msp1 +
7	0				3627	934.203	307.41	8.50166	15	WT +		0	0	0		0	0	0
8	0				3627	814.386	187.593	5.18804	1	20 -		1	40.242	21.2172		1	40.9257	24.723
9	0				3627	1077.47	450.674	12.4637	5	20 -		5	74.2572	34.7353		5	98.3199	41.3633
10	0				3627	1203.44	576.646	15.9476	15	20 -		15	100	67.0652		15	125.802	56.9078
11	0				3627	769.356	142.564	3.94272	1	20 +
12	0				3627	937.63	310.838	6.59646	5	20 +
13	0				3627	954.949	328.157	9.07543	15	20 +
1	0			Bkg	5459	943.386	0	0
	0		Sum	Sum	43524	11137.4	3615.88	100
							IVI08
No	Grp	Grp Name	Name	Type	Area [pixel]	Intensity [a.u.]	Intensity-Bkg [a.u.]	Intensity-Bkg [%]	Std. Quantity [ng]	Recalc. Quantity [ng]
5	0				1995	182.651	95.3117	7.31643	WT -	1	Msp1
6	0				1995	264.182	176.843	13.575	WT -	5
7	0				1995	279.013	191.674	14.7135	WT -	15
8	0				1995	161.554	74.2155	5.69701	20 -	1										AVG						SD
9	0				1995	227.38	140.041	10.75	20 -	5		WT Mito				Tom20D Mito				Msp1						Msp1
10	0				1995	312.952	225.613	17.3188	20 -	15			Msp1-	Msp1 +			Msp1-	Msp1 +			WT -	WT +C90	20d -	20d +C90			WT -	WT +C90	20d -	20d +C90
11	0				1995	169.186	81.8468	6.28282	20 +	1		0	0	0		0	0	0		0	0	0	0	0		0	0	0	0	0
12	0				1995	250.229	162.89	12.504	20 +	5		1	49.726			1	38.7196	36.2775		1	55.168	42.0663	60.4566	36.448		1	18.1087	18.2822	24.8337	8.41062
13	0				1995	241.611	154.272	11.8424	20 +	15		5	92.2625			5	73.0623	72.1989		5	83.7073	58.2006	91.8778	60.086		5	7.91047	21.1355	17.3751	13.6563
1	0			Bkg	1995	87.3388	0	0		1		15	100			15	117.707	68.379		15	100	81.1579	125.195	68.034		15	0	12.2062	6.58504	8.24628
	0		Sum	Sum	17955	2088.76	1302.71	100		5
										15
							IVI044
No	Grp	Grp Name	Name	Type	Area [pixel]	Intensity [a.u.]	Intensity-Bkg [a.u.]	Intensity-Bkg [%]	Std. Quantity [ng]	Recalc. Quantity [ng]
2	0				2765	725.861	323.885	7.4513	1	WT -	Msp1
3	0				2765	750.252	348.277	8.01246	5	WT -
4	0				2765	799.198	397.222	9.13849	15	WT -
5	0				2765	708.806	306.831	5.05895	1	WT +
6	0				2765	702.839	300.864	6.92167	5	WT +
7	0				2765	751.57	349.595	8.04278	15	WT +
8	0				2765	757.869	355.894	8.18769	1	20 -		WT Mito				Tom20D Mito
9	0				2765	849.997	448.022	10.3072	5	20 -			Msp1-	Msp1 +			Msp1-	Msp1 +
10	0				2765	932.8	530.825	12.2121	15	20 -		0	0	0		0	0	0
11	0				2765	619.557	217.581	5.00568	1	20 +		1	81.5376	55.3587		1	89.5956	40.9893
12	0				2765	762.321	360.346	8.29011	5	20 +		5	87.6781	75.742		5	112.789	67.8841
13	0				2765	809.327	407.352	9.37153	15	20 +		15	100	88.0099		15	133.634	76.7394
1	0			Bkg	3471	504.614	5.68434e-14	1.30774e-15
	0		Sum	Sum	33180	9170.4	4346.69	100
