# Supplementary material for: A network of cytosolic (co)chaperones promotes the biogenesis of mitochondrial signal-anchored outer membrane proteins
Source: eLife journal article supplement (doi:10.7554/elife.77706), 2022-07-25

Figure 2-source data 3

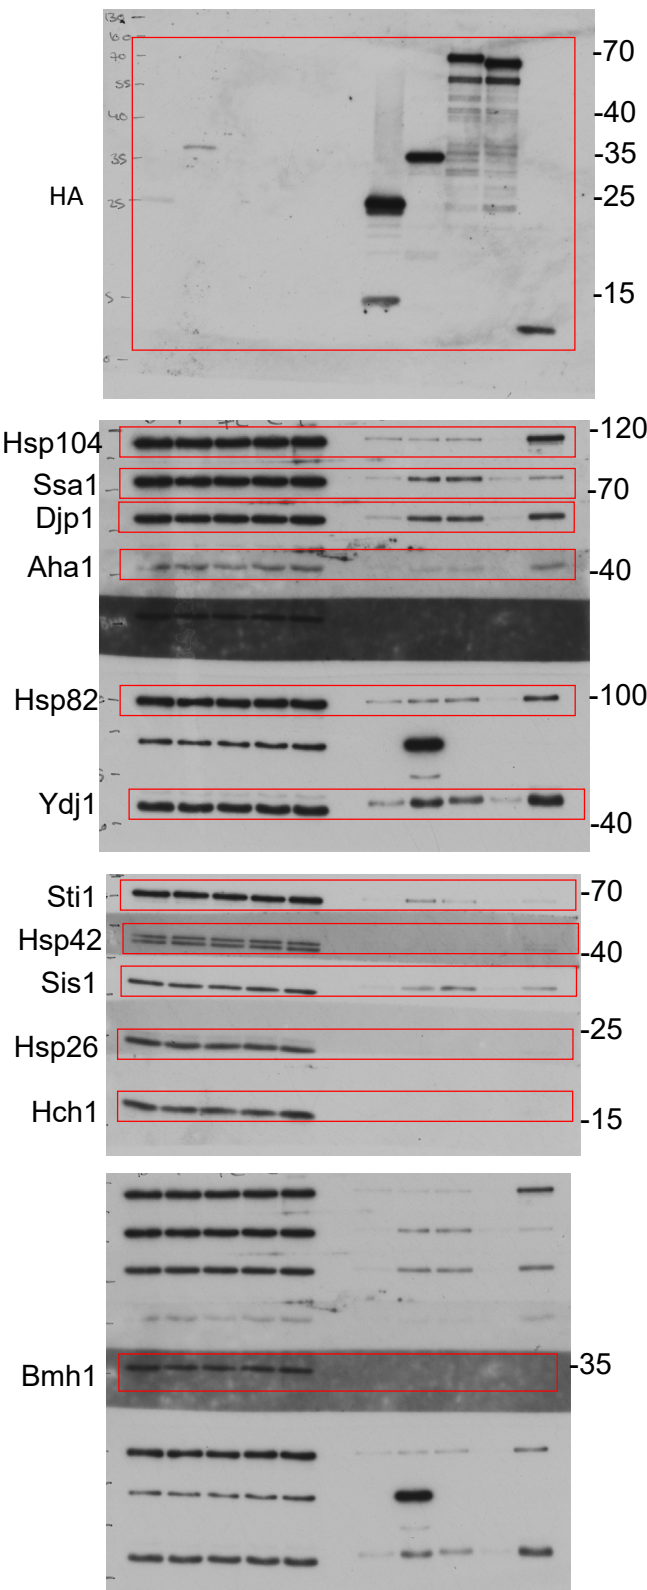

Supplement: supp [file elife-77706-supp-v1.zip]
